# Supplementary figures and images for: Clinical features, treatment strategies and outcomes of craniocervical junction arteriovenous fistulas: a cohort study of 193 patients
Source: HighWire-hosted journal article supplement (doi:10.1136/svn-2023-002436), 2023-05-26

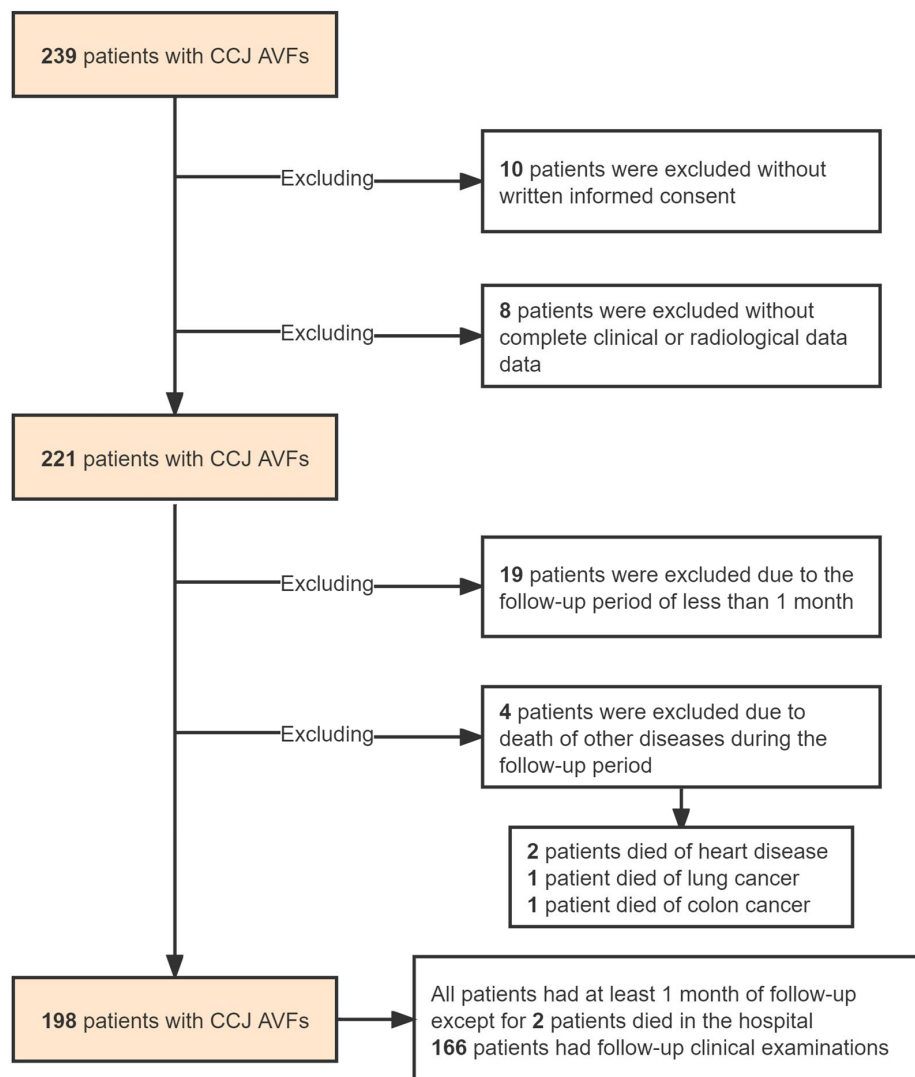

**Supplemental Figure 1.** Research flow chart of the included participants.

Supplement: svn-2023-002436supp001_data_supplement.pdf [file svn-2023-002436supp001_data_supplement.pdf]
